# Supplementary material
Source: HighWire-hosted journal article supplement (https://bmjopen.bmj.com/content/7/9/e015760)
Supplement: inline-supplementary-material-1 [file inline-supplementary-material-1.pdf]

## Supplementary File 1: ICPC2 coding for Horizon scan reports

| <i>Horizon scan report</i>                                                                                                                                       | <i>ICPC2</i>  | <i>diagnosis</i>                         | <i>Domains</i>                           |
|------------------------------------------------------------------------------------------------------------------------------------------------------------------|---------------|------------------------------------------|------------------------------------------|
| <i>Point-of-care tests for malaria</i>                                                                                                                           | A73           | malaria                                  | General and Unspecified                  |
| <i>Point-of-care Procalcitonin</i>                                                                                                                               | A78           | infectious diseases NOS                  | General and Unspecified                  |
| <i>Point-of-care C-reactive protein</i>                                                                                                                          | A78           | infectious diseases NOS                  | General and Unspecified                  |
| <i>Point-of-care test for total white blood cell count</i>                                                                                                       | A78           | infectious diseases NOS                  | General and Unspecified                  |
| <i>Non-contact infrared thermometers</i>                                                                                                                         | A78           | infectious diseases NOS                  | General and Unspecified                  |
| <i>Transcutaneous bilirubin measurement</i>                                                                                                                      | D13           | jaundice                                 | Digestive                                |
| <i>Point-of-care for Hepatitis C virus</i>                                                                                                                       | D72           | viral hepatitis                          | Digestive                                |
| <i>Point-of-care faecal occult blood testing</i>                                                                                                                 | D75           | Malignant neoplasm colon                 | Digestive                                |
| <i>Point-of-care calprotectin tests</i>                                                                                                                          | D94           | Chronic enteritis/ulcerative colitis     | Digestive                                |
| <i>Point-of-care testing for coeliac disease</i>                                                                                                                 | D99           | Disease digestive system, other          | Digestive                                |
| <i>Point-of-care (POC) Testing for a panel of Cardiac Markers</i>                                                                                                | K75           | Acute myocardial infarction              | Cardiovascular                           |
| <i>Point-of-care Cardiac Troponin</i>                                                                                                                            | K75           | Acute myocardial infarction              | Cardiovascular                           |
| <i>Point-of-care testing for heart-type Fatty Acid Binding Protein</i>                                                                                           | K75           | Acute myocardial infarction              | Cardiovascular                           |
| <i>Point-of-care BNP</i>                                                                                                                                         | K77           | Heart failure                            | Cardiovascular                           |
| <i>Genotyping polymorphisms affecting warfarin metabolism</i>                                                                                                    | K78           | Atrial fibrillation/flutter              | Cardiovascular                           |
| <i>Hand-held ECG monitors for the detection of atrial fibrillation (AF) in primary care</i>                                                                      | K78           | Atrial fibrillation/flutter              | Cardiovascular                           |
| <i>Point-of-care INR coagulometers</i>                                                                                                                           | K78           | Atrial fibrillation/flutter              | Cardiovascular                           |
| <i>Portable Ultrasound Devices</i>                                                                                                                               | K81, K93      | Heart/arterial murmur NOS                | Cardiovascular                           |
| <i>Point-of-care Pulse Wave Analysis</i>                                                                                                                         | K86           | Hypertension uncomplicated               | Cardiovascular                           |
| <i>The D-Dimer Test for ruling out Deep Vein Thrombosis in Primary Care</i>                                                                                      | K93           | Pulmonary embolism                       | Cardiovascular                           |
| <i>Autoimmune markers for the diagnosis of Rheumatoid Arthritis in primary care</i>                                                                              | L88           | Rheumatoid/seropositive arthritis        | Musculoskeletal                          |
| <i>Point-of-care Hand-held nerve conduction measurement devices for carpal tunnel syndrome</i>                                                                   | N93           | carpal tunnel syndrome                   | Neurological                             |
| <i>Point-of-care tests for group A streptococcus</i>                                                                                                             | R72           | strep throat                             | Respiratory                              |
| <i>Point-of-care tests for influenza in children</i>                                                                                                             | R80           | Influenza                                | Respiratory                              |
| <i>Pulse Oximetry in Primary Care</i>                                                                                                                            | R81, R95, R96 | Pneumonia, COPD, Asthma                  | Respiratory                              |
| <i>A portable handheld electronic nose in the diagnosis of cancer, asthma and infection</i>                                                                      | R84, R96      | Malignant neoplasm bronchus/lung, Asthma | Respiratory                              |
| <i>Point-of-care Spirometry</i>                                                                                                                                  | R95           | COPD                                     | Respiratory                              |
| <i>Point-of-care Automated lung sound analysis</i>                                                                                                               | R96           | Asthma                                   | Respiratory                              |
| <i>Dermoscopy for the diagnosis of melanoma in primary care</i>                                                                                                  | S77           | malignant neoplasm skin                  | Skin                                     |
| <i>Point-of-care testing for thyroid stimulating hormone</i>                                                                                                     | T85           | hyperthyroidism                          | Endocrine/Metabolic and Nutritional      |
| <i>Point-of-care blood test for ketones in diabetes patients</i>                                                                                                 | T89           | diabetes, insulin dependent              | Endocrine/Metabolic and Nutritional      |
| <i>Point-of-care test for HbA1C</i>                                                                                                                              | T89           | diabetes, insulin dependent              | Endocrine/Metabolic and Nutritional      |
| <i>Point-of-care HbA1c tests: diagnosis of diabetes</i>                                                                                                          | T89           | diabetes, insulin dependent              | Endocrine/Metabolic and Nutritional      |
| <i>Point-of-care test for the analysis of lipid panels</i>                                                                                                       | T93           | Lipid disorder                           | Endocrine/Metabolic and Nutritional      |
| <i>Point-of-care urine albumin:creatinine ratio test for the early detection and management of renal disease and as a risk factor for cardiovascular disease</i> | U99           | Urinary disease, other                   | Urological                               |
| <i>Point-of-care Creatinine Testing for the Detection and Monitoring of Chronic Kidney Disease</i>                                                               | U99           | Urinary disease, other                   | Urological                               |
| <i>Point-of-care neutrophil gelatinase-associated lipocalin (NGAL) tests</i>                                                                                     | U99           | Urinary disease, other                   | Urological                               |
| <i>Point-of-care testing for human chorionic gonadotrophin (hCG)</i>                                                                                             | W78           | Pregnancy                                | Pregnancy, Childbearing, Family Planning |
| <i>Urinalysis self-testing in pregnancy</i>                                                                                                                      | W78           | Pregnancy                                | Pregnancy, Childbearing, Family Planning |
| <i>Testing for Chlamydia trachomatis in Primary Care using self-taken swabs</i>                                                                                  | X92           | Chlamydia infection, genital             | Female Genital                           |
